# Supplementary material
Source: ML conference proceedings conference paper supplement (https://proceedings.neurips.cc/paper_files/paper/2020/hash/439fca360bc99c315c5882c4432ae7a4-Abstract.html)
Supplement: Supplementary file [file 439fca360bc99c315c5882c4432ae7a4-Supplemental.zip]

## A Supplementary Information for Fourth-Order Symplectic Integrator

Any numerical integration scheme that preserves the symplectic two-form  $d\mathbf{p} \wedge d\mathbf{q}$  is said to be a symplectic integrator. These integrators are highly accurate and commonly employed for computing the time evolution of Hamiltonian systems. For a separable Hamiltonian  $\mathcal{H} = T(\mathbf{p}) + V(\mathbf{q})$  with states  $(\mathbf{q}_i, \mathbf{p}_i)$  at time  $t_i$ , a fourth order symplectic integrator may be implemented as shown in Algorithm 1. When implemented in PyTorch with tensor operations, we may use automatic differentiation to readily back-propagate through the integrator and accumulate losses.

---

### Algorithm 1: Fourth-order Symplectic Integrator

---

**Input** :  $\mathbf{q}_i, \mathbf{p}_i, t_i, t_{i+1}, \frac{\partial T}{\partial \mathbf{p}}, \frac{\partial V}{\partial \mathbf{q}}, \text{eps}$   
**Output** :  $\mathbf{q}_{i+1}, \mathbf{p}_{i+1}$

```

1 steps  $\leftarrow (t_{i+1} - t_i) / (4 * \text{eps})$  ;
2 h  $\leftarrow (t_{i+1} - t_i) / \text{steps}$  ;
3 kq  $\leftarrow \mathbf{q}_i$  ;
4 kp  $\leftarrow \mathbf{p}_i$  ;
5 for i  $\leftarrow 1$  to steps do
6   for j  $\leftarrow 1$  to 4 do
7     tp  $\leftarrow \mathbf{kp}$  ;
8     tq  $\leftarrow \mathbf{kq} + c_j * h * \frac{\partial T}{\partial \mathbf{p}}(\mathbf{kp})$  ;
9     kp  $\leftarrow \mathbf{tp} - d_j * h * \frac{\partial V}{\partial \mathbf{q}}(\mathbf{kq})$  ;
10    kq  $\leftarrow \mathbf{tq}$  ;
11  end
12 end
13 return kq, kp

```

---

Note that  $c = [c_1, c_2, c_3, c_4]$  and  $d = [d_1, d_2, d_3, d_4]$  are constants defined as follows:

$$c_1 = c_4 = \frac{1}{2(2 - 2^{1/3})} \quad (1)$$

$$c_2 = c_3 = \frac{1 - 2^{1/3}}{2(2 - 2^{1/3})} \quad (2)$$

$$d_1 = d_3 = \frac{1}{2 - 2^{1/3}} \quad (3)$$

$$d_2 = \frac{2^{1/3}}{2 - 2^{1/3}} \quad (4)$$

$$d_4 = 0 \quad (5)$$
